# Supplementary material
Source: PubMed Central journal article supplement (PMC8901038)
Supplement: supp1-3042051.pdf [file supp1-3042051.pdf]

# Supplementary Materials

## A Pervasive Respiratory Monitoring Sensor for COVID-19 Pandemic

Xiaoshuai Chen, *Student Member, IEEE*, Shuo Jiang, Zeyu Li, Benny Lo\*, *Senior Member, IEEE*

### 1. Description

The supplementary materials aim to provide extra information about our original work for COVID-19 Pandemic monitoring, which is useful for understanding our work and further improvements of related systems. It includes comprehensive performance testing, algorithm designing, prediction results, and system comparison. Four main sections are conducted, including the respiration signal strength distribution with the barometric sensor at different spatial locations (Fig. S1-S5), the confusion matrix for coughing detection (Fig. S6), the pseudocode of duplicate points reduction (Table. 1), a performance comparison of current respiration monitoring systems (Table. 2).

### 2. Details

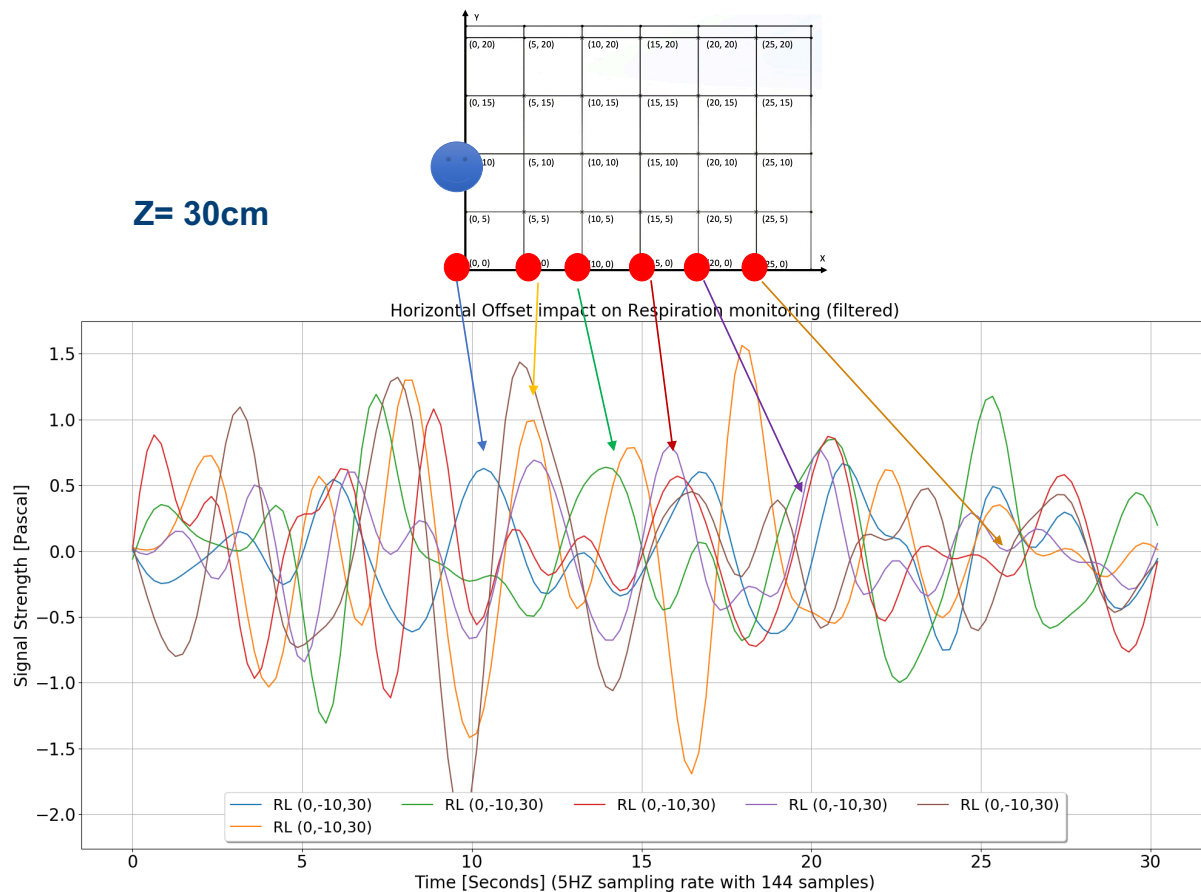

FIGURE S1. Signal strength distribution with 30 cm Z offset, -10 cm Y offset and 0-25 cm X offset.

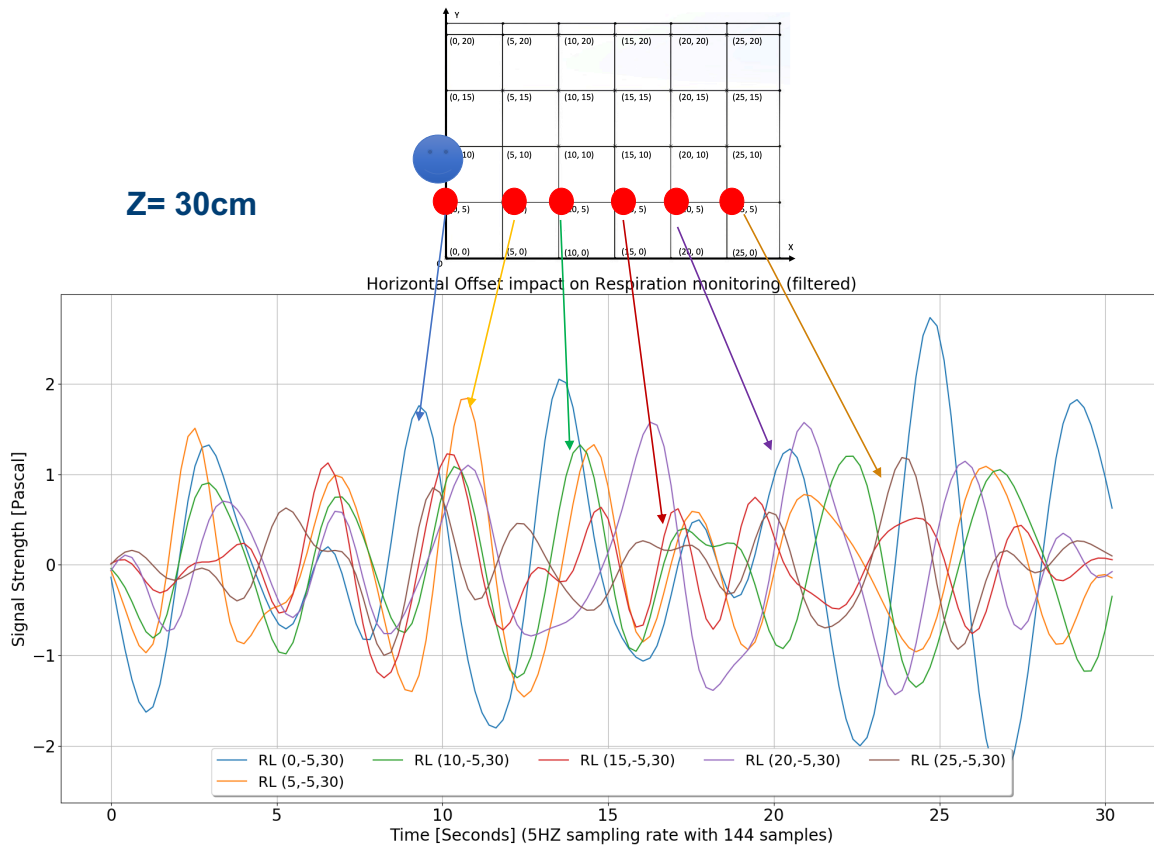

FIGURE S2. Signal strength distribution with 30 cm Z offset, -5 cm Y offset and 0-25 cm X offset.

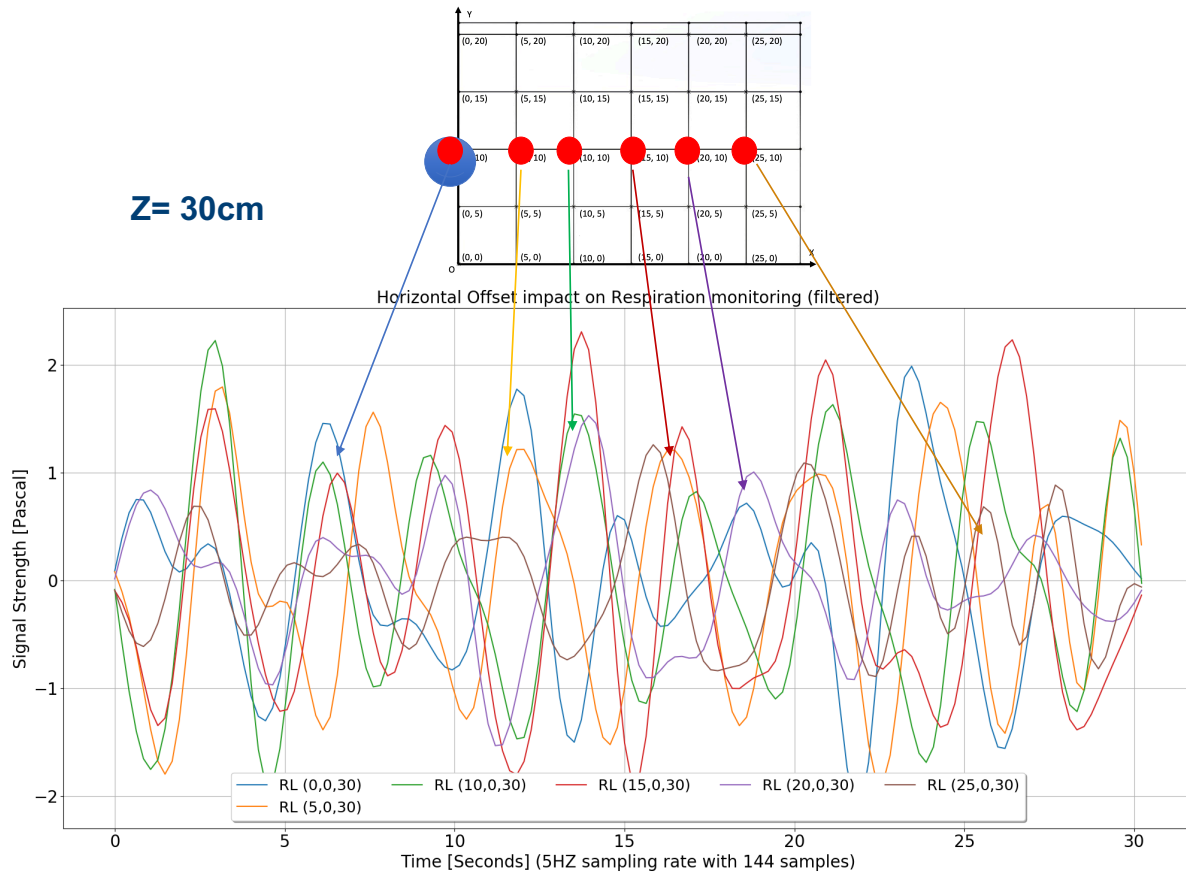

FIGURE S3. Signal strength distribution with 30 cm Z offset, 0 cm Y offset and 0-25 cm X offset.

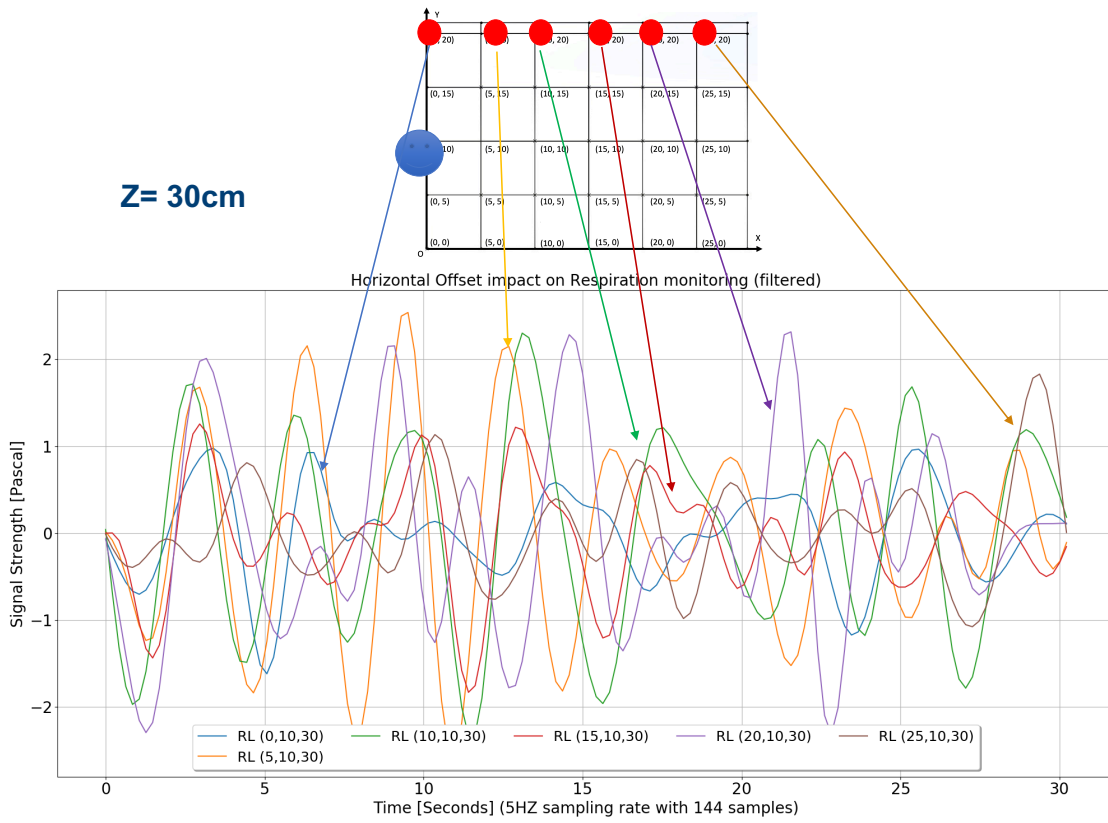

FIGURE S4. Signal strength distribution with 30 cm Z offset, 5 cm Y offset and 0-25 cm X offset.

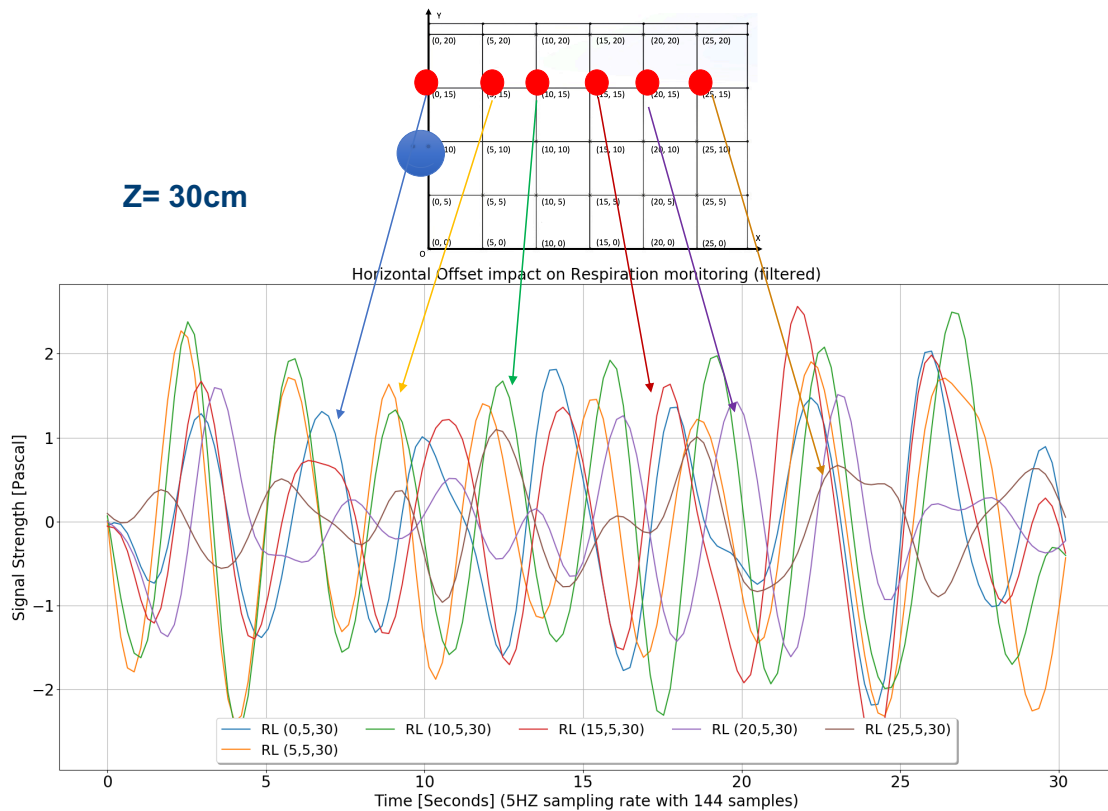

FIGURE S5. Signal strength distribution with 30 cm Z offset, 10 cm Y offset and 0-25 cm X offset.

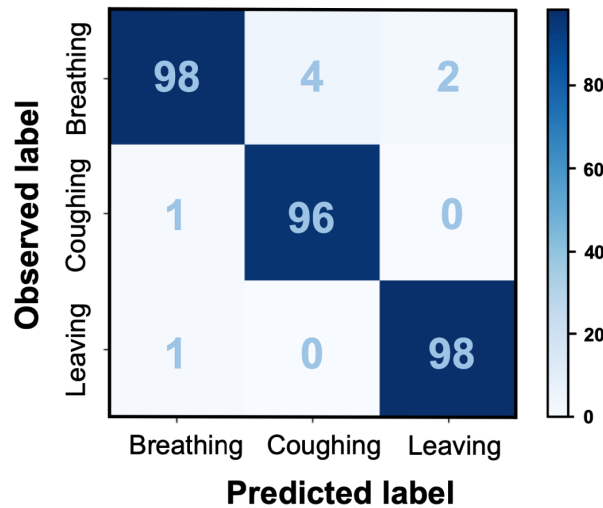

FIGURE S6. Confusion matrix of coughing detection.

TABLE II. ALGORITHM FOR DUPLICATE POINTS REDUCTION

```

Input: Peak, valley points matrix  $[P, V]$  and Respiration matrix  $[X]$ 
Output: Crossing peak-valley points location matrix  $[P_c, V_c]$ 
1:  $i = 0; j = 0; S = \min(P[0], V[0]);$ 
2: while  $i < \text{len}(P)$  and  $j < \text{len}(V)$  do
3:   if  $P[i] < V[j]:$ 
4:     if  $S = \text{'valley'}:$ 
5:        $S = \text{'peak'}; i += 1;$ 
6:     else:
7:       if  $\text{abs}(X_{V_{j-1}} - X_{P_i}) > \text{abs}(X_{V_{j-1}} - X_{P_{i-1}}):$ 
8:          $\text{Del\_Peak.append}(i-1)$ 
9:       else:
10:         $\text{Del\_Peak.append}(i)$ 
11:   else:
12:     if  $S = \text{'peak'}:$ 
13:        $S = \text{'valley'}; j += 1;$ 
14:     else:
15:       if  $\text{abs}(X_{P_{i-1}} - X_{V_j}) > \text{abs}(X_{P_{i-1}} - X_{V_{j-1}}):$ 
16:          $\text{Del\_Peak.append}(j-1)$ 
17:       else:
18:         $\text{Del\_Peak.append}(j-1)$ 
19:  $P_c = P [m \notin \text{Del\_Peak for } m \text{ in } P]$ 
20:  $V_c = V [n \notin \text{Del\_Valley for } n \text{ in } V];$ 
21: return  $[P_c, V_c]$ 

```

TABLE I. A COMPARISON OF SPECIFICITY OF CURRENT RESPIRATION MONITORING SYSTEMS

| Method                 | Specificity | System sensitivity   | Payload convenience | Expense Cost | Privacy |
|------------------------|-------------|----------------------|---------------------|--------------|---------|
| Accelerometer [1]      | 82.34%      | Activity movements   | Wearable            | Low          | Yes     |
| Radar [2]              | 80%         | Environmental signal | Ambient             | High         | Yes     |
| WiFi [3]               | 89.78%      | Electronics signal   | Ambient             | Low          | Yes     |
| Acoustic sensor [4]    | 96.58%      | Spatial distance     | Ambient             | Low          | No      |
| Stretchable sensor [5] | -           | Activity movements   | Wearable            | High         | Yes     |
| Thermal imaging [6]    | 99.9%       | Spatial distance     | Ambient             | Low          | No      |
| Thermistor [7]         | 69.27%      | Breathing strength   | Invasive            | Low          | Yes     |
| Capnometry [8]         | 12%         | Breathing depth      | Wearable            | High         | Yes     |
| Our system             | 98.98%      | Spatial distance     | Ambient             | low          | Yes     |

## Reference

- [1] D. Phan, S. Bonnet, R. Guillemaud, E. Castelli, and N. P. Thi, "Estimation of respiratory waveform and heart rate using an accelerometer," in *2008 30th Annual International Conference of the IEEE Engineering in Medicine and Biology Society*, 2008: IEEE, pp. 4916-4919.
- [2] Y. Xiao, C. Li, and J. Lin, "A portable noncontact heartbeat and respiration monitoring system using 5-GHz radar," *IEEE Sensors Journal*, vol. 7, no. 7, pp. 1042-1043, 2007.
- [3] X. Liu, J. Cao, S. Tang, J. Wen, and P. Guo, "Contactless respiration monitoring via off-the-shelf WiFi devices," *IEEE Transactions on Mobile Computing*, vol. 15, no. 10, pp. 2466-2479, 2015.
- [4] C. Liu, J. Xiong, L. Cai, L. Feng, X. Chen, and D. Fang, "Beyond respiration: Contactless sleep sound-activity recognition using RF signals," *Proceedings of the ACM on Interactive, Mobile, Wearable and Ubiquitous Technologies*, vol. 3, no. 3, pp. 1-22, 2019.
- [5] A. Bates, M. J. Ling, J. Mann, and D. K. Arvind, "Respiratory rate and flow waveform estimation from tri-axial accelerometer data," in *2010 International Conference on Body Sensor Networks*, 2010: IEEE, pp. 144-150.
- [6] A. H. Alkali, R. Saatchi, H. Elphick, and D. Burke, "Thermal image processing for real-time non-contact respiration rate monitoring," *IET Circuits, Devices & Systems*, vol. 11, no. 2, pp. 142-148, 2017.
- [7] A. Sabil *et al.*, "Comparison of apnea detection using oronasal thermal airflow sensor, nasal pressure transducer, respiratory inductance plethysmography and tracheal sound sensor," *Journal of Clinical Sleep Medicine*, vol. 15, no. 2, pp. 285-292, 2019.
- [8] B. G. Goudra, L. C. Penugonda, R. M. Speck, and A. C. Sinha, "Comparison of acoustic respiration rate, impedance pneumography and capnometry monitors for respiration rate accuracy and apnea detection during GI endoscopy anesthesia," 2013.
